# Supplementary material for: Electronic Population-Based Depression Detection and Management Through Universal Screening in the Veterans Health Administration
Source: PubMed Central journal article supplement (PMC8914576; doi:10.1001/jamanetworkopen.2022.1875), 2022-03-10
Supplement: jamanetwopen-e221875-s001.pdf [file jamanetwopen-e221875-s001.pdf]

## Supplemental Online Content

Leung LB, Chu K, Rose D, et al. Electronic population-based depression detection and management through universal screening in the Veterans Health Administration. *JAMA Network Open*. 2022;5(3):e221875. doi:10.1001/jamanetworkopen.2022.1875

**eTable 1.** *ICD-10* Codes Used for Depression Diagnosis

**eTable 2.** List of Drugs Classified as Antidepressant Medication in Study

**eTable 3.** *Current Procedural Terminology (CPT)* Codes for Psychotherapy

**eTable 4.** VA Clinic Stop Codes for Mental Health Specialty Visits

**eTable 5.** *ICD-10* Codes Used for Other Mental Health Diagnoses in Study

**eTable 6.** Associations Between Receipt of Timely Depression Follow-up and Treatment and Various Patient Characteristics (Among All Screen-Positive Patients)

This supplemental material has been provided by the authors to give readers additional information about their work.

**eTable 1. ICD-10 Codes Used for Depression Diagnosis**

| <b>ICD-10 code</b> | <b>ICD-10 Description</b>                                                           |
|--------------------|-------------------------------------------------------------------------------------|
| F32.0              | MAJOR DEPRESSIVE DISORDER, SINGLE EPISODE, MILD                                     |
| F32.1              | MAJOR DEPRESSIVE DISORDER, SINGLE EPISODE, MODERATE                                 |
| F32.2              | MAJOR DEPRESSIVE DISORDER, SINGLE EPISODE, SEVERE WITHOUT PSYCHOTIC FEATURES        |
| F32.3              | MAJOR DEPRESSIVE DISORDER, SINGLE EPISODE, SEVERE WITH PSYCHOTIC FEATURES           |
| F32.4              | MAJOR DEPRESSIVE DISORDER, SINGLE EPISODE, IN PARTIAL REMISSION                     |
| F32.5              | MAJOR DEPRESSIVE DISORDER, SINGLE EPISODE, IN FULL REMISSION                        |
| F32.8              | OTHER DEPRESSIVE EPISODES                                                           |
| F32.89             | OTHER SPECIFIED DEPRESSIVE EPISODES                                                 |
| F32.9              | MAJOR DEPRESSIVE DISORDER, SINGLE EPISODE, UNSPECIFIED                              |
| F33.0              | MAJOR DEPRESSIVE DISORDER, RECURRENT, MILD                                          |
| F33.1              | MAJOR DEPRESSIVE DISORDER, RECURRENT, MODERATE                                      |
| F33.2              | MAJOR DEPRESSIVE DISORDER, RECURRENT SEVERE WITHOUT PSYCHOTIC FEATURES              |
| F33.3              | MAJOR DEPRESSIVE DISORDER, RECURRENT, SEVERE WITH PSYCHOTIC SYMPTOMS                |
| F33.40             | MAJOR DEPRESSIVE DISORDER, RECURRENT, IN REMISSION, UNSPECIFIED                     |
| F33.41             | MAJOR DEPRESSIVE DISORDER, RECURRENT, IN PARTIAL REMISSION                          |
| F33.42             | MAJOR DEPRESSIVE DISORDER, RECURRENT, IN FULL REMISSION                             |
| F33.8              | OTHER RECURRENT DEPRESSIVE DISORDERS                                                |
| F33.9              | MAJOR DEPRESSIVE DISORDER, RECURRENT, UNSPECIFIED                                   |
| F06.30             | MOOD DISORDER DUE TO KNOWN PHYSIOLOGICAL CONDITION, UNSPECIFIED                     |
| F39.               | UNSPECIFIED MOOD [AFFECTIVE] DISORDER                                               |
| F34.1              | DYSTHYMIC DISORDER                                                                  |
| F43.21             | ADJUSTMENT DISORDER WITH DEPRESSED MOOD                                             |
| F31.30             | BIPOLAR DISORDER, CURRENT EPISODE DEPRESSED, MILD OR MODERATE SEVERITY, UNSPECIFIED |
| F31.31             | BIPOLAR DISORDER, CURRENT EPISODE DEPRESSED, MILD                                   |
| F31.32             | BIPOLAR DISORDER, CURRENT EPISODE DEPRESSED, MODERATE                               |
| F31.4              | BIPOLAR DISORDER, CURRENT EPISODE DEPRESSED, SEVERE, WITHOUT PSYCHOTIC FEATURES     |
| F31.5              | BIPOLAR DISORDER, CURRENT EPISODE DEPRESSED, SEVERE, WITH PSYCHOTIC FEATURES        |
| F31.75             | BIPOLAR DISORDER, IN PARTIAL REMISSION, MOST RECENT EPISODE DEPRESSED               |
| F31.76             | BIPOLAR DISORDER, IN FULL REMISSION, MOST RECENT EPISODE DEPRESSED                  |

**eTable 2.** List of Drugs Classified as Antidepressant Medication in Study

| <b>DrugClass</b> | <b>DrugClassification</b>                  |
|------------------|--------------------------------------------|
| CN600            | ANTIDEPRESSANTS                            |
| CN601            | TRICYCLIC ANTIDEPRESSANTS                  |
| CN602            | MONAMINE OXIDASE INHIBITOR ANTIDEPRESSANTS |
| CN609            | ANTIDEPRESSANTS, OTHER                     |
|                  |                                            |
|                  | <b>DrugName</b>                            |
|                  | AMITRIPTYLINE                              |
|                  | AMOXAPINE                                  |
|                  | BUPROPION                                  |
|                  | CITALOPRAM                                 |
|                  | CLOMIPRAMINE                               |
|                  | DESIPRAMINE                                |
|                  | DESVENLAFAXINE                             |
|                  | DOXEPIN                                    |
|                  | DULOXETINE                                 |
|                  | ESCITALOPRAM                               |
|                  | FLUOXETINE                                 |
|                  | FLUVOXAMINE                                |
|                  | IMIPRAMINE                                 |
|                  | ISOCARBOXAZID                              |
|                  | LEVOMILNACIPRAN                            |
|                  | MAPROTILINE                                |
|                  | MILNACIPRAN                                |
|                  | MIRTAZAPINE                                |
|                  | NEFAZODONE                                 |
|                  | NOMIFENSINE                                |
|                  | NORTRIPTYLINE                              |
|                  | PAROXETINE                                 |
|                  | PHENELZINE SULFATE                         |
|                  | PROTRIPTYLINE                              |
|                  | SELEGILINE                                 |
|                  | SERTRALINE                                 |
|                  | TRANLYCYPROMINE                            |
|                  | TRIMIPRAMINE                               |
|                  | TRAZODONE                                  |
|                  | VENLAFAXINE                                |
|                  | VILAZODONE                                 |
|                  | VORTIOXETINE                               |

**eTable 3.** Current Procedural Terminology (CPT) Codes for Psychotherapy

| <b>CPT codes</b> | <b>CPT Name</b>                                      |
|------------------|------------------------------------------------------|
| 90791            | PSYCH DIAGNOSTIC EVALUATION                          |
| 90792            | PSYCH DIAG EVAL W/MED SRVCS                          |
| 90832            | PSYTX W PT 30 MINUTES                                |
| 90833            | PSYTX W PT W E/M 30 MIN                              |
| 90834            | PSYTX W PT 45 MINUTES                                |
| 90836            | PSYTX W PT W E/M 45 MIN                              |
| 90837            | PSYTX W PT 60 MINUTES                                |
| 90838            | PSYTX W PT W E/M 60 MIN                              |
| 90839            | PSYTX CRISIS INITIAL 60 MIN                          |
| 90840            | PSYTX CRISIS EA ADDL 30 MIN                          |
| 90845            | PSYCHOANALYSIS                                       |
| 90847            | FAMILY PSYTX W/PT 50 MIN                             |
| 90849            | MULTIPLE FAMILY GROUP PSYTX                          |
| 90853            | GROUP PSYCHOTHERAPY                                  |
| 90857            | INTAC GROUP PSYTX                                    |
| 90870            | ELECTROCONVULSIVE THERAPY                            |
| 90871            | ELECTROCONVULSIVE THERAPY, MULTIPLE SEIZURES PER DAY |
| 90875            | PSYCHOPHYSIOLOGICAL THERAPY, 30 MIN                  |
| 90876            | PSYCHOPHYSIOLOGICAL THERAPY, 45 MIN                  |

**eTable 4.** VA Clinic Stop Codes for Mental Health Specialty Visits

| Clinic stop code | MHS - Mental Health Service-related clinic stop codes description                        |
|------------------|------------------------------------------------------------------------------------------|
| 165              | BEREAVEMENT COUNSELING                                                                   |
| 292              | OBSERVATION PSYCHIATRY                                                                   |
| 501              | HOMELESS MENTALLY ILL OUTREACH                                                           |
| 502              | MENTAL HEALTH CLINIC- INDIVIDUAL                                                         |
| 503              | MENTAL HEALTH RESIDENTIAL CARE- INDIVIDUAL                                               |
| 504              | GRANT AND DIEM - GROUP                                                                   |
| 505              | DAY TREATMENT- INDIVIDUAL                                                                |
| 506              | DAY HOSPITAL- INDIVIDUAL                                                                 |
| 507              | HUD/VASH- GROUP                                                                          |
| 508              | HCHV/HCFI- GROUP                                                                         |
| 509              | PSYCHIATRY                                                                               |
| 510              | PSYCHOLOGY                                                                               |
| 511              | GRANT AND PER DIEM- INDIVIDUAL                                                           |
| 512              | MENTAL HEALTH CONSULTATION                                                               |
| 513              | SUBSTANCE USE DISORDER- INDIVIDUAL                                                       |
| 514              | SUBSTANCE USE DISORDER- HOME VISIT                                                       |
| 515              | CWT/TR-HCFI                                                                              |
| 516              | POST TRAUMATIC STRESS DISORDER (PTSD)- GROUP                                             |
| 517              | CWT/SUBSTANCE ABUSE                                                                      |
| 518              | CWT/TR-SUBSTANCE ABUSE                                                                   |
| 519              | SUBSTANCE USE DISORDER/PTSD TEAMS                                                        |
| 520              | LONG-TERM ENHANCEMENT-INDIVIDUAL                                                         |
| 521              | LONG-TERM ENHANCEMENT-GROUP                                                              |
| 522              | DEPARTMENT OF HOUSING AND URBAN DEVELOPMENT (HUD)-VA SUPPORTED HOUSING (VASH) INDIVIDUAL |
| 523              | OPIOID TREATMENT PROGRAM                                                                 |
| 524              | ACTIVE DUTY SEXUAL TRAUMA                                                                |
| 525              | WOMEN'S STRESS DISORDER TREATMENT TEAMS                                                  |
| 526              | TELEPHONE/SPECIAL PSYCHIATRY                                                             |
| 527              | TELEPHONE MH                                                                             |
| 528              | TELEPHONE HOMELESS CHRONICALLY MENTALLY ILL (HCFI)                                       |
| 529              | HEALTH CARE FOR HOMELESS VETERANS (HCHV)/HCFI INDIVIDUAL                                 |
| 530              | TELEPHONE HUD-VASH                                                                       |
| 531              | PRI CARE FOR PTS WITH SMI                                                                |
| 532              | PSYCHOSOCIAL REHABILITATION- INDIVIDUAL                                                  |
| 533              | MH INTERVENTION BIOMEDICAL CARE- INDIVIDUAL                                              |
| 534              | MENTAL HEALTH INTEGRATED CARE- INDIVIDUAL                                                |
| 535              | MENTAL HEALTH VOCATIONAL ASSISTANCE - INDIVIDUAL                                         |
| 536              | TELEPHONE MH VOCATIONAL ASSISTANCE                                                       |

|     |                                                                                                               |
|-----|---------------------------------------------------------------------------------------------------------------|
| 537 | TELEPHONE PSYCHOSOCIAL REHABILITATION                                                                         |
| 538 | PSYCHOLOGICAL TESTING                                                                                         |
| 539 | MH INTEGRATED CARE- GROUP                                                                                     |
| 540 | PTSD CLINICAL TEAM (PCT) POST- TRAUMATIC STRESS INDIVIDUAL                                                    |
| 541 | PTSD POST-TRAUMATIC STRESS                                                                                    |
| 542 | TELEPHONE PTSD                                                                                                |
| 543 | TELEPHONE/ALCOHOL DEPENDENCE                                                                                  |
| 544 | TELEPHONE/DRUG DEPENDENCE                                                                                     |
| 545 | TELEPHONE/SUBSTANCE USE DISORDER                                                                              |
| 546 | TELEPHONE MH INTENSIVE CARE MANAGEMENT (MHICM)                                                                |
| 547 | INTENSIVE SUBSTANCE USE DISORDER- GROUP                                                                       |
| 548 | INTENSIVE SUBSTANCE USE DISORDER- INDIVIDUAL                                                                  |
| 550 | MENTAL HEALTH CLINIC- GROUP                                                                                   |
| 551 | IPCC COMMUNITY CLINIC/ DAY PROGRAM VISIT                                                                      |
| 552 | MENTAL HEALTH INTENSIVE CASE MANAGEMENT (MHICM)- INDIVIDUAL                                                   |
| 553 | DAY TREATMENT- GROUP                                                                                          |
| 554 | DAY HOSPITAL- GROUP                                                                                           |
| 555 | HOMELESS VT COM EMP SVC INDIV                                                                                 |
| 556 | HOMELESS VT COM EMP SVC GRP                                                                                   |
| 557 | PSYCHIATRY- GROUP                                                                                             |
| 558 | PSYCHOLOGY- GROUP                                                                                             |
| 559 | PSYCHOSOCIAL REHABILITATION- GROUP                                                                            |
| 560 | SUBSTANCE USE DISORDER- GROUP                                                                                 |
| 561 | PCT- POST TRAUMATIC STRESS- GROUP                                                                             |
| 562 | PTSD- INDIVIDUAL                                                                                              |
| 563 | MENTAL HEALTH PRIMARY CARE - GROUP                                                                            |
| 564 | MENTAL HEALTH TEAM CASE MANAGEMENT                                                                            |
| 565 | MH INTERVENTION BIOMEDICAL CARE- GROUP                                                                        |
| 566 | MENTAL HEALTH RISK-FACTOR REDUCTION EDUCATIONAL GROUP                                                         |
| 567 | MENTAL HEALTH INTENSIVE CASE MANAGEMENT (MHICM) GROUP                                                         |
| 568 | MENTAL HEALTH COMPENSATED WORK THERAPY/ SUPPORTED EMPLOYMENT (CWT/SE) FACE-TO-FACE                            |
| 569 | MENTAL HEALTH COMPENSATED WORK THERAPY/SUPPORTED EMPLOYMENT (CWT/SE) NON FACE-TO-FACE CBO NON-COUNT           |
| 570 | MENTAL HEALTH COMPENSATED WORK THERAPY/ TRANSITIONAL WORK EXPERIENCE (CWT/TWE) NON FACE-TO-FACE CBO NON-COUNT |
| 571 | SERV-MH (SERVICES FOR RETURNING VETERANS-MENTAL HEALTH)- INDIVIDUAL                                           |
| 572 | SERV-MH (SERVICES FOR RETURNING VETERANS-MENTAL HEALTH)- GROUP                                                |
| 573 | MENTAL HEALTH INCENTIVE THERAPY FACE-TO-FACE                                                                  |
| 574 | MENTAL HEALTH COMPENSATED WORK THERAPY/TRANSITIONAL WORK EXPERIENCE (CWT/TWE) FACE-TO-FACE                    |
| 575 | MENTAL HEALTH VOCATIONAL ASSISTANCE- GROUP                                                                    |
| 576 | PSYCHOGERIATRIC CLINIC- INDIVIDUAL                                                                            |

|     |                                                                                  |
|-----|----------------------------------------------------------------------------------|
| 577 | PSYCHOGERIATRIC CLINIC- GROUP                                                    |
| 578 | PSYCHOGERIATRIC DAY PROGRAM                                                      |
| 579 | TELEPHONE PSYCHOGERIATRICALS                                                     |
| 580 | PTSD DAY HOSPITAL                                                                |
| 581 | PTSD DAY TREATMENT                                                               |
| 582 | PSYCHOSOCIAL REHABILITATION RECOVERY CENTER (PRRC)- INDIVIDUAL                   |
| 583 | PSYCHOSOCIAL REHABILITATION RECOVERY CENTER (PRRC)- GROUP                        |
| 584 | TELEPHONE PSYCHOSOCIAL REHABILITATION RECOVERY CENTER (PRRC)                     |
| 586 | RESIDENTIAL REHABILITATION TREATMENT PROGRAM (RRTP) - INDIVIDUAL                 |
| 587 | RESIDENTIAL REHABILITATION TREATMENT PROGRAM (RRTP) - GROUP                      |
| 588 | RESIDENTIAL REHABILITATION TREATMENT PROGRAM (RRTP) AFTERCARE-INDIVIDUAL         |
| 589 | NON-ACTIVE DUTY SEXUAL TRAUMA                                                    |
| 590 | COMMUNITY OUTREACH HOMELESS VETS BY STAFF OTHER THAN HCHV AND RRTP PROGRAMS      |
| 591 | INCARCERATED VETERANS RE-ENTRY                                                   |
| 592 | VETERANS JUSTICE OUTREACH                                                        |
| 593 | RESIDENTIAL REHABILITATION TREATMENT PROGRAM (RRTP) OUTREACH SERVICES            |
| 594 | RESIDENTIAL REHABILITATION TREATMENT PROGRAM (RRTP) AFTERCARE - COMMUNITY        |
| 595 | RESIDENTIAL REHABILITATION TREATMENT PROGRAM (RRTP) AFTERCARE-GROUP              |
| 596 | RESIDENTIAL REHABILITATION TREATMENT PROGRAM (RRTP) ADMISSION SCREENING SERVICES |
| 597 | TELEPHONE/RESIDENTIAL REHABILITATION TREATMENT PROGRAM (RRTP)                    |
| 598 | RESIDENTIAL REHABILITATION TREATMENT PROGRAM (RRTP) OUTPATIENT - INDIVIDUAL      |
| 599 | RESIDENTIAL REHABILITATION TREATMENT PROGRAM (RRTP) OUTPATIENT - GROUP           |

**eTable 5. ICD-10 Codes Used for Other Mental Health Diagnoses in Study**

| PTSD_VA | PTSD_VA_Desc                                                                   |
|---------|--------------------------------------------------------------------------------|
| F43.10  | POST-TRAUMATIC STRESS DISORDER, UNSPECIFIED                                    |
| F43.11  | POST-TRAUMATIC STRESS DISORDER, ACUTE                                          |
| F43.12  | POST-TRAUMATIC STRESS DISORDER, CHRONIC                                        |
|         |                                                                                |
| ETOH_VA | ETOH_VA_Desc                                                                   |
| F10.10  | ALCOHOL ABUSE, UNCOMPLICATED                                                   |
| F10.120 | ALCOHOL ABUSE WITH INTOXICATION, UNCOMPLICATED                                 |
| F10.121 | ALCOHOL ABUSE WITH INTOXICATION DELIRIUM                                       |
| F10.129 | ALCOHOL ABUSE WITH INTOXICATION, UNSPECIFIED                                   |
| F10.14  | ALCOHOL ABUSE WITH ALCOHOL-INDUCED MOOD DISORDER                               |
| F10.150 | ALCOHOL ABUSE WITH ALCOHOL-INDUCED PSYCHOTIC DISORDER WITH DELUSIONS           |
| F10.151 | ALCOHOL ABUSE WITH ALCOHOL-INDUCED PSYCHOTIC DISORDER WITH HALLUCINATIONS      |
| F10.159 | ALCOHOL ABUSE WITH ALCOHOL-INDUCED PSYCHOTIC DISORDER, UNSPECIFIED             |
| F10.180 | ALCOHOL ABUSE WITH ALCOHOL-INDUCED ANXIETY DISORDER                            |
| F10.181 | ALCOHOL ABUSE WITH ALCOHOL-INDUCED SEXUAL DYSFUNCTION                          |
| F10.182 | ALCOHOL ABUSE WITH ALCOHOL-INDUCED SLEEP DISORDER                              |
| F10.188 | ALCOHOL ABUSE WITH OTHER ALCOHOL-INDUCED DISORDER                              |
| F10.19  | ALCOHOL ABUSE WITH UNSPECIFIED ALCOHOL-INDUCED DISORDER                        |
| F10.20  | ALCOHOL DEPENDENCE, UNCOMPLICATED                                              |
| F10.21  | ALCOHOL DEPENDENCE, IN REMISSION                                               |
| F10.220 | ALCOHOL DEPENDENCE WITH INTOXICATION, UNCOMPLICATED                            |
| F10.221 | ALCOHOL DEPENDENCE WITH INTOXICATION DELIRIUM                                  |
| F10.229 | ALCOHOL DEPENDENCE WITH INTOXICATION, UNSPECIFIED                              |
| F10.230 | ALCOHOL DEPENDENCE WITH WITHDRAWAL, UNCOMPLICATED                              |
| F10.231 | ALCOHOL DEPENDENCE WITH WITHDRAWAL DELIRIUM                                    |
| F10.232 | ALCOHOL DEPENDENCE WITH WITHDRAWAL WITH PERCEPTUAL DISTURBANCE                 |
| F10.239 | ALCOHOL DEPENDENCE WITH WITHDRAWAL, UNSPECIFIED                                |
| F10.24  | ALCOHOL DEPENDENCE WITH ALCOHOL-INDUCED MOOD DISORDER                          |
| F10.250 | ALCOHOL DEPENDENCE WITH ALCOHOL-INDUCED PSYCHOTIC DISORDER WITH DELUSIONS      |
| F10.251 | ALCOHOL DEPENDENCE WITH ALCOHOL-INDUCED PSYCHOTIC DISORDER WITH HALLUCINATIONS |
| F10.259 | ALCOHOL DEPENDENCE WITH ALCOHOL-INDUCED PSYCHOTIC DISORDER, UNSPECIFIED        |
| F10.26  | ALCOHOL DEPENDENCE WITH ALCOHOL-INDUCED PERSISTING AMNESTIC DISORDER           |
| F10.27  | ALCOHOL DEPENDENCE WITH ALCOHOL-INDUCED PERSISTING DEMENTIA                    |
| F10.280 | ALCOHOL DEPENDENCE WITH ALCOHOL-INDUCED ANXIETY DISORDER                       |
| F10.281 | ALCOHOL DEPENDENCE WITH ALCOHOL-INDUCED SEXUAL DYSFUNCTION                     |
| F10.282 | ALCOHOL DEPENDENCE WITH ALCOHOL-INDUCED SLEEP DISORDER                         |



|         |                                                                                      |
|---------|--------------------------------------------------------------------------------------|
| F10.288 | ALCOHOL DEPENDENCE WITH OTHER ALCOHOL-INDUCED DISORDER                               |
| F10.29  | ALCOHOL DEPENDENCE WITH UNSPECIFIED ALCOHOL-INDUCED DISORDER                         |
| F10.920 | ALCOHOL USE, UNSPECIFIED WITH INTOXICATION, UNCOMPLICATED                            |
| F10.921 | ALCOHOL USE, UNSPECIFIED WITH INTOXICATION DELIRIUM                                  |
| F10.929 | ALCOHOL USE, UNSPECIFIED WITH INTOXICATION, UNSPECIFIED                              |
| F10.94  | ALCOHOL USE, UNSPECIFIED WITH ALCOHOL-INDUCED MOOD DISORDER                          |
| F10.950 | ALCOHOL USE, UNSPECIFIED WITH ALCOHOL-INDUCED PSYCHOTIC DISORDER WITH DELUSIONS      |
| F10.951 | ALCOHOL USE, UNSPECIFIED WITH ALCOHOL-INDUCED PSYCHOTIC DISORDER WITH HALLUCINATIONS |
| F10.959 | ALCOHOL USE, UNSPECIFIED WITH ALCOHOL-INDUCED PSYCHOTIC DISORDER, UNSPECIFIED        |
| F10.96  | ALCOHOL USE, UNSPECIFIED WITH ALCOHOL-INDUCED PERSISTING AMNESTIC DISORDER           |
| F10.97  | ALCOHOL USE, UNSPECIFIED WITH ALCOHOL-INDUCED PERSISTING DEMENTIA                    |
| F10.980 | ALCOHOL USE, UNSPECIFIED WITH ALCOHOL-INDUCED ANXIETY DISORDER                       |
| F10.981 | ALCOHOL USE, UNSPECIFIED WITH ALCOHOL-INDUCED SEXUAL DYSFUNCTION                     |
| F10.982 | ALCOHOL USE, UNSPECIFIED WITH ALCOHOL-INDUCED SLEEP DISORDER                         |
| F10.988 | ALCOHOL USE, UNSPECIFIED WITH OTHER ALCOHOL-INDUCED DISORDER                         |
| F10.99  | ALCOHOL USE, UNSPECIFIED WITH UNSPECIFIED ALCOHOL-INDUCED DISORDER                   |
|         |                                                                                      |
| OPIA_VA | OPIA_VA_Desc                                                                         |
| F11.10  | OPIOID ABUSE, UNCOMPLICATED                                                          |
| F11.120 | OPIOID ABUSE WITH INTOXICATION, UNCOMPLICATED                                        |
| F11.121 | OPIOID ABUSE WITH INTOXICATION DELIRIUM                                              |
| F11.122 | OPIOID ABUSE WITH INTOXICATION WITH PERCEPTUAL DISTURBANCE                           |
| F11.129 | OPIOID ABUSE WITH INTOXICATION, UNSPECIFIED                                          |
| F11.14  | OPIOID ABUSE WITH OPIOID-INDUCED MOOD DISORDER                                       |
| F11.150 | OPIOID ABUSE WITH OPIOID-INDUCED PSYCHOTIC DISORDER WITH DELUSIONS                   |
| F11.151 | OPIOID ABUSE WITH OPIOID-INDUCED PSYCHOTIC DISORDER WITH HALLUCINATIONS              |
| F11.159 | OPIOID ABUSE WITH OPIOID-INDUCED PSYCHOTIC DISORDER, UNSPECIFIED                     |
| F11.181 | OPIOID ABUSE WITH OPIOID-INDUCED SEXUAL DYSFUNCTION                                  |
| F11.182 | OPIOID ABUSE WITH OPIOID-INDUCED SLEEP DISORDER                                      |
| F11.188 | OPIOID ABUSE WITH OTHER OPIOID-INDUCED DISORDER                                      |
| F11.19  | OPIOID ABUSE WITH UNSPECIFIED OPIOID-INDUCED DISORDER                                |
| F11.20  | OPIOID DEPENDENCE, UNCOMPLICATED                                                     |
| F11.21  | OPIOID DEPENDENCE, IN REMISSION                                                      |
| F11.220 | OPIOID DEPENDENCE WITH INTOXICATION, UNCOMPLICATED                                   |
| F11.221 | OPIOID DEPENDENCE WITH INTOXICATION DELIRIUM                                         |
| F11.222 | OPIOID DEPENDENCE WITH INTOXICATION WITH PERCEPTUAL DISTURBANCE                      |
| F11.229 | OPIOID DEPENDENCE WITH INTOXICATION, UNSPECIFIED                                     |
| F11.23  | OPIOID DEPENDENCE WITH WITHDRAWAL                                                    |

|         |                                                                                    |
|---------|------------------------------------------------------------------------------------|
| F11.24  | OPIOID DEPENDENCE WITH OPIOID-INDUCED MOOD DISORDER                                |
| F11.250 | OPIOID DEPENDENCE WITH OPIOID-INDUCED PSYCHOTIC DISORDER WITH DELUSIONS            |
| F11.251 | OPIOID DEPENDENCE WITH OPIOID-INDUCED PSYCHOTIC DISORDER WITH HALLUCINATIONS       |
| F11.259 | OPIOID DEPENDENCE WITH OPIOID-INDUCED PSYCHOTIC DISORDER, UNSPECIFIED              |
| F11.281 | OPIOID DEPENDENCE WITH OPIOID-INDUCED SEXUAL DYSFUNCTION                           |
| F11.282 | OPIOID DEPENDENCE WITH OPIOID-INDUCED SLEEP DISORDER                               |
| F11.288 | OPIOID DEPENDENCE WITH OTHER OPIOID-INDUCED DISORDER                               |
| F11.29  | OPIOID DEPENDENCE WITH UNSPECIFIED OPIOID-INDUCED DISORDER                         |
| F11.90  | OPIOID USE, UNSPECIFIED, UNCOMPLICATED                                             |
| F11.920 | OPIOID USE, UNSPECIFIED WITH INTOXICATION, UNCOMPLICATED                           |
| F11.921 | OPIOID USE, UNSPECIFIED WITH INTOXICATION DELIRIUM                                 |
| F11.922 | OPIOID USE, UNSPECIFIED WITH INTOXICATION WITH PERCEPTUAL DISTURBANCE              |
| F11.929 | OPIOID USE, UNSPECIFIED WITH INTOXICATION, UNSPECIFIED                             |
| F11.93  | OPIOID USE, UNSPECIFIED WITH WITHDRAWAL                                            |
| F11.94  | OPIOID USE, UNSPECIFIED WITH OPIOID-INDUCED MOOD DISORDER                          |
| F11.950 | OPIOID USE, UNSPECIFIED WITH OPIOID-INDUCED PSYCHOTIC DISORDER WITH DELUSIONS      |
| F11.951 | OPIOID USE, UNSPECIFIED WITH OPIOID-INDUCED PSYCHOTIC DISORDER WITH HALLUCINATIONS |
| F11.959 | OPIOID USE, UNSPECIFIED WITH OPIOID-INDUCED PSYCHOTIC DISORDER, UNSPECIFIED        |
| F11.981 | OPIOID USE, UNSPECIFIED WITH OPIOID-INDUCED SEXUAL DYSFUNCTION                     |
| F11.982 | OPIOID USE, UNSPECIFIED WITH OPIOID-INDUCED SLEEP DISORDER                         |
| F11.988 | OPIOID USE, UNSPECIFIED WITH OTHER OPIOID-INDUCED DISORDER                         |
| F11.99  | OPIOID USE, UNSPECIFIED WITH UNSPECIFIED OPIOID-INDUCED DISORDER                   |
|         |                                                                                    |
| CANN_VA | CANN_VA_Desc                                                                       |
| F12.10  | CANNABIS ABUSE, UNCOMPLICATED                                                      |
| F12.120 | CANNABIS ABUSE WITH INTOXICATION, UNCOMPLICATED                                    |
| F12.121 | CANNABIS ABUSE WITH INTOXICATION DELIRIUM                                          |
| F12.122 | CANNABIS ABUSE WITH INTOXICATION WITH PERCEPTUAL DISTURBANCE                       |
| F12.129 | CANNABIS ABUSE WITH INTOXICATION, UNSPECIFIED                                      |
| F12.150 | CANNABIS ABUSE WITH PSYCHOTIC DISORDER WITH DELUSIONS                              |
| F12.151 | CANNABIS ABUSE WITH PSYCHOTIC DISORDER WITH HALLUCINATIONS                         |
| F12.159 | CANNABIS ABUSE WITH PSYCHOTIC DISORDER, UNSPECIFIED                                |
| F12.180 | CANNABIS ABUSE WITH CANNABIS-INDUCED ANXIETY DISORDER                              |
| F12.188 | CANNABIS ABUSE WITH OTHER CANNABIS-INDUCED DISORDER                                |
| F12.19  | CANNABIS ABUSE WITH UNSPECIFIED CANNABIS-INDUCED DISORDER                          |
| F12.20  | CANNABIS DEPENDENCE, UNCOMPLICATED                                                 |
| F12.21  | CANNABIS DEPENDENCE, IN REMISSION                                                  |
| F12.220 | CANNABIS DEPENDENCE WITH INTOXICATION, UNCOMPLICATED                               |
| F12.221 | CANNABIS DEPENDENCE WITH INTOXICATION DELIRIUM                                     |

|         |                                                                                                                             |
|---------|-----------------------------------------------------------------------------------------------------------------------------|
| F12.222 | CANNABIS DEPENDENCE WITH INTOXICATION WITH PERCEPTUAL DISTURBANCE                                                           |
| F12.229 | CANNABIS DEPENDENCE WITH INTOXICATION, UNSPECIFIED                                                                          |
| F12.250 | CANNABIS DEPENDENCE WITH PSYCHOTIC DISORDER WITH DELUSIONS                                                                  |
| F12.251 | CANNABIS DEPENDENCE WITH PSYCHOTIC DISORDER WITH HALLUCINATIONS                                                             |
| F12.259 | CANNABIS DEPENDENCE WITH PSYCHOTIC DISORDER, UNSPECIFIED                                                                    |
| F12.280 | CANNABIS DEPENDENCE WITH CANNABIS-INDUCED ANXIETY DISORDER                                                                  |
| F12.288 | CANNABIS DEPENDENCE WITH OTHER CANNABIS-INDUCED DISORDER                                                                    |
| F12.29  | CANNABIS DEPENDENCE WITH UNSPECIFIED CANNABIS-INDUCED DISORDER                                                              |
| F12.90  | CANNABIS USE, UNSPECIFIED, UNCOMPLICATED                                                                                    |
| F12.920 | CANNABIS USE, UNSPECIFIED WITH INTOXICATION, UNCOMPLICATED                                                                  |
| F12.921 | CANNABIS USE, UNSPECIFIED WITH INTOXICATION DELIRIUM                                                                        |
| F12.922 | CANNABIS USE, UNSPECIFIED WITH INTOXICATION WITH PERCEPTUAL DISTURBANCE                                                     |
| F12.929 | CANNABIS USE, UNSPECIFIED WITH INTOXICATION, UNSPECIFIED                                                                    |
| F12.950 | CANNABIS USE, UNSPECIFIED WITH PSYCHOTIC DISORDER WITH DELUSIONS                                                            |
| F12.951 | CANNABIS USE, UNSPECIFIED WITH PSYCHOTIC DISORDER WITH HALLUCINATIONS                                                       |
| F12.959 | CANNABIS USE, UNSPECIFIED WITH PSYCHOTIC DISORDER, UNSPECIFIED                                                              |
| F12.980 | CANNABIS USE, UNSPECIFIED WITH ANXIETY DISORDER                                                                             |
| F12.988 | CANNABIS USE, UNSPECIFIED WITH OTHER CANNABIS-INDUCED DISORDER                                                              |
| F12.99  | CANNABIS USE, UNSPECIFIED WITH UNSPECIFIED CANNABIS-INDUCED DISORDER                                                        |
|         |                                                                                                                             |
| SEDA_VA | SEDA_VA_Desc                                                                                                                |
| F13.10  | SEDATIVE, HYPNOTIC OR ANXIOLYTIC ABUSE, UNCOMPLICATED                                                                       |
| F13.120 | SEDATIVE, HYPNOTIC OR ANXIOLYTIC ABUSE WITH INTOXICATION, UNCOMPLICATED                                                     |
| F13.121 | SEDATIVE, HYPNOTIC OR ANXIOLYTIC ABUSE WITH INTOXICATION DELIRIUM                                                           |
| F13.129 | SEDATIVE, HYPNOTIC OR ANXIOLYTIC ABUSE WITH INTOXICATION, UNSPECIFIED                                                       |
| F13.14  | SEDATIVE, HYPNOTIC OR ANXIOLYTIC ABUSE WITH SEDATIVE, HYPNOTIC OR ANXIOLYTIC-INDUCED MOOD DISORDER                          |
| F13.150 | SEDATIVE, HYPNOTIC OR ANXIOLYTIC ABUSE WITH SEDATIVE, HYPNOTIC OR ANXIOLYTIC-INDUCED PSYCHOTIC DISORDER WITH DELUSIONS      |
| F13.151 | SEDATIVE, HYPNOTIC OR ANXIOLYTIC ABUSE WITH SEDATIVE, HYPNOTIC OR ANXIOLYTIC-INDUCED PSYCHOTIC DISORDER WITH HALLUCINATIONS |
| F13.159 | SEDATIVE, HYPNOTIC OR ANXIOLYTIC ABUSE WITH SEDATIVE, HYPNOTIC OR ANXIOLYTIC-INDUCED PSYCHOTIC DISORDER, UNSPECIFIED        |
| F13.180 | SEDATIVE, HYPNOTIC OR ANXIOLYTIC ABUSE WITH SEDATIVE, HYPNOTIC OR ANXIOLYTIC-INDUCED ANXIETY DISORDER                       |
| F13.181 | SEDATIVE, HYPNOTIC OR ANXIOLYTIC ABUSE WITH SEDATIVE, HYPNOTIC OR ANXIOLYTIC-INDUCED SEXUAL DYSFUNCTION                     |
| F13.182 | SEDATIVE, HYPNOTIC OR ANXIOLYTIC ABUSE WITH SEDATIVE, HYPNOTIC OR ANXIOLYTIC-INDUCED SLEEP DISORDER                         |
| F13.188 | SEDATIVE, HYPNOTIC OR ANXIOLYTIC ABUSE WITH OTHER SEDATIVE, HYPNOTIC OR ANXIOLYTIC-INDUCED DISORDER                         |
| F13.19  | SEDATIVE, HYPNOTIC OR ANXIOLYTIC ABUSE WITH UNSPECIFIED SEDATIVE, HYPNOTIC OR ANXIOLYTIC-INDUCED DISORDER                   |

|         |                                                                                                                                  |
|---------|----------------------------------------------------------------------------------------------------------------------------------|
| F13.20  | SEDATIVE, HYPNOTIC OR ANXIOLYTIC DEPENDENCE, UNCOMPLICATED                                                                       |
| F13.21  | SEDATIVE, HYPNOTIC OR ANXIOLYTIC DEPENDENCE, IN REMISSION                                                                        |
| F13.220 | SEDATIVE, HYPNOTIC OR ANXIOLYTIC DEPENDENCE WITH INTOXICATION, UNCOMPLICATED                                                     |
| F13.221 | SEDATIVE, HYPNOTIC OR ANXIOLYTIC DEPENDENCE WITH INTOXICATION DELIRIUM                                                           |
| F13.229 | SEDATIVE, HYPNOTIC OR ANXIOLYTIC DEPENDENCE WITH INTOXICATION, UNSPECIFIED                                                       |
| F13.230 | SEDATIVE, HYPNOTIC OR ANXIOLYTIC DEPENDENCE WITH WITHDRAWAL, UNCOMPLICATED                                                       |
| F13.231 | SEDATIVE, HYPNOTIC OR ANXIOLYTIC DEPENDENCE WITH WITHDRAWAL DELIRIUM                                                             |
| F13.232 | SEDATIVE, HYPNOTIC OR ANXIOLYTIC DEPENDENCE WITH WITHDRAWAL WITH PERCEPTUAL DISTURBANCE                                          |
| F13.239 | SEDATIVE, HYPNOTIC OR ANXIOLYTIC DEPENDENCE WITH WITHDRAWAL, UNSPECIFIED                                                         |
| F13.24  | SEDATIVE, HYPNOTIC OR ANXIOLYTIC DEPENDENCE WITH SEDATIVE, HYPNOTIC OR ANXIOLYTIC-INDUCED MOOD DISORDER                          |
| F13.250 | SEDATIVE, HYPNOTIC OR ANXIOLYTIC DEPENDENCE WITH SEDATIVE, HYPNOTIC OR ANXIOLYTIC-INDUCED PSYCHOTIC DISORDER WITH DELUSIONS      |
| F13.251 | SEDATIVE, HYPNOTIC OR ANXIOLYTIC DEPENDENCE WITH SEDATIVE, HYPNOTIC OR ANXIOLYTIC-INDUCED PSYCHOTIC DISORDER WITH HALLUCINATIONS |
| F13.259 | SEDATIVE, HYPNOTIC OR ANXIOLYTIC DEPENDENCE WITH SEDATIVE, HYPNOTIC OR ANXIOLYTIC-INDUCED PSYCHOTIC DISORDER, UNSPECIFIED        |
| F13.26  | SEDATIVE, HYPNOTIC OR ANXIOLYTIC DEPENDENCE WITH SEDATIVE, HYPNOTIC OR ANXIOLYTIC-INDUCED PERSISTING AMNESTIC DISORDER           |
| F13.27  | SEDATIVE, HYPNOTIC OR ANXIOLYTIC DEPENDENCE WITH SEDATIVE, HYPNOTIC OR ANXIOLYTIC-INDUCED PERSISTING DEMENTIA                    |
| F13.280 | SEDATIVE, HYPNOTIC OR ANXIOLYTIC DEPENDENCE WITH SEDATIVE, HYPNOTIC OR ANXIOLYTIC-INDUCED ANXIETY DISORDER                       |
| F13.281 | SEDATIVE, HYPNOTIC OR ANXIOLYTIC DEPENDENCE WITH SEDATIVE, HYPNOTIC OR ANXIOLYTIC-INDUCED SEXUAL DYSFUNCTION                     |
| F13.282 | SEDATIVE, HYPNOTIC OR ANXIOLYTIC DEPENDENCE WITH SEDATIVE, HYPNOTIC OR ANXIOLYTIC-INDUCED SLEEP DISORDER                         |
| F13.288 | SEDATIVE, HYPNOTIC OR ANXIOLYTIC DEPENDENCE WITH OTHER SEDATIVE, HYPNOTIC OR ANXIOLYTIC-INDUCED DISORDER                         |
| F13.29  | SEDATIVE, HYPNOTIC OR ANXIOLYTIC DEPENDENCE WITH UNSPECIFIED SEDATIVE, HYPNOTIC OR ANXIOLYTIC-INDUCED DISORDER                   |
| F13.90  | SEDATIVE, HYPNOTIC, OR ANXIOLYTIC USE, UNSPECIFIED, UNCOMPLICATED                                                                |
| F13.920 | SEDATIVE, HYPNOTIC OR ANXIOLYTIC USE, UNSPECIFIED WITH INTOXICATION, UNCOMPLICATED                                               |
| F13.921 | SEDATIVE, HYPNOTIC OR ANXIOLYTIC USE, UNSPECIFIED WITH INTOXICATION DELIRIUM                                                     |
| F13.929 | SEDATIVE, HYPNOTIC OR ANXIOLYTIC USE, UNSPECIFIED WITH INTOXICATION, UNSPECIFIED                                                 |
| F13.930 | SEDATIVE, HYPNOTIC OR ANXIOLYTIC USE, UNSPECIFIED WITH WITHDRAWAL, UNCOMPLICATED                                                 |
| F13.931 | SEDATIVE, HYPNOTIC OR ANXIOLYTIC USE, UNSPECIFIED WITH WITHDRAWAL DELIRIUM                                                       |
| F13.932 | SEDATIVE, HYPNOTIC OR ANXIOLYTIC USE, UNSPECIFIED WITH WITHDRAWAL WITH PERCEPTUAL DISTURBANCES                                   |

|         |                                                                                                                                        |
|---------|----------------------------------------------------------------------------------------------------------------------------------------|
| F13.939 | SEDATIVE, HYPNOTIC OR ANXIOLYTIC USE, UNSPECIFIED WITH WITHDRAWAL, UNSPECIFIED                                                         |
| F13.94  | SEDATIVE, HYPNOTIC OR ANXIOLYTIC USE, UNSPECIFIED WITH SEDATIVE, HYPNOTIC OR ANXIOLYTIC-INDUCED MOOD DISORDER                          |
| F13.950 | SEDATIVE, HYPNOTIC OR ANXIOLYTIC USE, UNSPECIFIED WITH SEDATIVE, HYPNOTIC OR ANXIOLYTIC-INDUCED PSYCHOTIC DISORDER WITH DELUSIONS      |
| F13.951 | SEDATIVE, HYPNOTIC OR ANXIOLYTIC USE, UNSPECIFIED WITH SEDATIVE, HYPNOTIC OR ANXIOLYTIC-INDUCED PSYCHOTIC DISORDER WITH HALLUCINATIONS |
| F13.959 | SEDATIVE, HYPNOTIC OR ANXIOLYTIC USE, UNSPECIFIED WITH SEDATIVE, HYPNOTIC OR ANXIOLYTIC-INDUCED PSYCHOTIC DISORDER, UNSPECIFIED        |
| F13.96  | SEDATIVE, HYPNOTIC OR ANXIOLYTIC USE, UNSPECIFIED WITH SEDATIVE, HYPNOTIC OR ANXIOLYTIC-INDUCED PERSISTING AMNESTIC DISORDER           |
| F13.97  | SEDATIVE, HYPNOTIC OR ANXIOLYTIC USE, UNSPECIFIED WITH SEDATIVE, HYPNOTIC OR ANXIOLYTIC-INDUCED PERSISTING DEMENTIA                    |
| F13.980 | SEDATIVE, HYPNOTIC OR ANXIOLYTIC USE, UNSPECIFIED WITH SEDATIVE, HYPNOTIC OR ANXIOLYTIC-INDUCED ANXIETY DISORDER                       |
| F13.981 | SEDATIVE, HYPNOTIC OR ANXIOLYTIC USE, UNSPECIFIED WITH SEDATIVE, HYPNOTIC OR ANXIOLYTIC-INDUCED SEXUAL DYSFUNCTION                     |
| F13.982 | SEDATIVE, HYPNOTIC OR ANXIOLYTIC USE, UNSPECIFIED WITH SEDATIVE, HYPNOTIC OR ANXIOLYTIC-INDUCED SLEEP DISORDER                         |
| F13.988 | SEDATIVE, HYPNOTIC OR ANXIOLYTIC USE, UNSPECIFIED WITH OTHER SEDATIVE, HYPNOTIC OR ANXIOLYTIC-INDUCED DISORDER                         |
| F13.99  | SEDATIVE, HYPNOTIC OR ANXIOLYTIC USE, UNSPECIFIED WITH UNSPECIFIED SEDATIVE, HYPNOTIC OR ANXIOLYTIC-INDUCED DISORDER                   |
|         |                                                                                                                                        |
| COKE_VA | COKE_VA_Desc                                                                                                                           |
| F14.10  | COCAINE ABUSE, UNCOMPLICATED                                                                                                           |
| F14.120 | COCAINE ABUSE WITH INTOXICATION, UNCOMPLICATED                                                                                         |
| F14.121 | COCAINE ABUSE WITH INTOXICATION WITH DELIRIUM                                                                                          |
| F14.122 | COCAINE ABUSE WITH INTOXICATION WITH PERCEPTUAL DISTURBANCE                                                                            |
| F14.129 | COCAINE ABUSE WITH INTOXICATION, UNSPECIFIED                                                                                           |
| F14.14  | COCAINE ABUSE WITH COCAINE-INDUCED MOOD DISORDER                                                                                       |
| F14.150 | COCAINE ABUSE WITH COCAINE-INDUCED PSYCHOTIC DISORDER WITH DELUSIONS                                                                   |
| F14.151 | COCAINE ABUSE WITH COCAINE-INDUCED PSYCHOTIC DISORDER WITH HALLUCINATIONS                                                              |
| F14.159 | COCAINE ABUSE WITH COCAINE-INDUCED PSYCHOTIC DISORDER, UNSPECIFIED                                                                     |
| F14.180 | COCAINE ABUSE WITH COCAINE-INDUCED ANXIETY DISORDER                                                                                    |
| F14.181 | COCAINE ABUSE WITH COCAINE-INDUCED SEXUAL DYSFUNCTION                                                                                  |
| F14.182 | COCAINE ABUSE WITH COCAINE-INDUCED SLEEP DISORDER                                                                                      |
| F14.188 | COCAINE ABUSE WITH OTHER COCAINE-INDUCED DISORDER                                                                                      |
| F14.19  | COCAINE ABUSE WITH UNSPECIFIED COCAINE-INDUCED DISORDER                                                                                |
| F14.20  | COCAINE DEPENDENCE, UNCOMPLICATED                                                                                                      |
| F14.21  | COCAINE DEPENDENCE, IN REMISSION                                                                                                       |
| F14.220 | COCAINE DEPENDENCE WITH INTOXICATION, UNCOMPLICATED                                                                                    |

|         |                                                                                      |
|---------|--------------------------------------------------------------------------------------|
| F14.221 | COCAINE DEPENDENCE WITH INTOXICATION DELIRIUM                                        |
| F14.222 | COCAINE DEPENDENCE WITH INTOXICATION WITH PERCEPTUAL DISTURBANCE                     |
| F14.229 | COCAINE DEPENDENCE WITH INTOXICATION, UNSPECIFIED                                    |
| F14.23  | COCAINE DEPENDENCE WITH WITHDRAWAL                                                   |
| F14.24  | COCAINE DEPENDENCE WITH COCAINE-INDUCED MOOD DISORDER                                |
| F14.250 | COCAINE DEPENDENCE WITH COCAINE-INDUCED PSYCHOTIC DISORDER WITH DELUSIONS            |
| F14.251 | COCAINE DEPENDENCE WITH COCAINE-INDUCED PSYCHOTIC DISORDER WITH HALLUCINATIONS       |
| F14.259 | COCAINE DEPENDENCE WITH COCAINE-INDUCED PSYCHOTIC DISORDER, UNSPECIFIED              |
| F14.280 | COCAINE DEPENDENCE WITH COCAINE-INDUCED ANXIETY DISORDER                             |
| F14.281 | COCAINE DEPENDENCE WITH COCAINE-INDUCED SEXUAL DYSFUNCTION                           |
| F14.282 | COCAINE DEPENDENCE WITH COCAINE-INDUCED SLEEP DISORDER                               |
| F14.288 | COCAINE DEPENDENCE WITH OTHER COCAINE-INDUCED DISORDER                               |
| F14.29  | COCAINE DEPENDENCE WITH UNSPECIFIED COCAINE-INDUCED DISORDER                         |
| F14.90  | COCAINE USE, UNSPECIFIED, UNCOMPLICATED                                              |
| F14.920 | COCAINE USE, UNSPECIFIED WITH INTOXICATION, UNCOMPLICATED                            |
| F14.921 | COCAINE USE, UNSPECIFIED WITH INTOXICATION DELIRIUM                                  |
| F14.922 | COCAINE USE, UNSPECIFIED WITH INTOXICATION WITH PERCEPTUAL DISTURBANCE               |
| F14.929 | COCAINE USE, UNSPECIFIED WITH INTOXICATION, UNSPECIFIED                              |
| F14.94  | COCAINE USE, UNSPECIFIED WITH COCAINE-INDUCED MOOD DISORDER                          |
| F14.950 | COCAINE USE, UNSPECIFIED WITH COCAINE-INDUCED PSYCHOTIC DISORDER WITH DELUSIONS      |
| F14.951 | COCAINE USE, UNSPECIFIED WITH COCAINE-INDUCED PSYCHOTIC DISORDER WITH HALLUCINATIONS |
| F14.959 | COCAINE USE, UNSPECIFIED WITH COCAINE-INDUCED PSYCHOTIC DISORDER, UNSPECIFIED        |
| F14.980 | COCAINE USE, UNSPECIFIED WITH COCAINE-INDUCED ANXIETY DISORDER                       |
| F14.981 | COCAINE USE, UNSPECIFIED WITH COCAINE-INDUCED SEXUAL DYSFUNCTION                     |
| F14.982 | COCAINE USE, UNSPECIFIED WITH COCAINE-INDUCED SLEEP DISORDER                         |
| F14.988 | COCAINE USE, UNSPECIFIED WITH OTHER COCAINE-INDUCED DISORDER                         |
| F14.99  | COCAINE USE, UNSPECIFIED WITH UNSPECIFIED COCAINE-INDUCED DISORDER                   |
|         |                                                                                      |
| AMPH_VA | AMPH_VA_Desc                                                                         |
| F15.10  | OTHER STIMULANT ABUSE, UNCOMPLICATED                                                 |
| F15.20  | OTHER STIMULANT DEPENDENCE, UNCOMPLICATED                                            |
| F15.929 | OTHER STIMULANT USE, UNSPECIFIED WITH INTOXICATION, UNSPECIFIED                      |
|         |                                                                                      |
| HALL_VA | HALL_VA_Desc                                                                         |
| F16.10  | HALLUCINOGEN ABUSE, UNCOMPLICATED                                                    |
| F16.20  | HALLUCINOGEN DEPENDENCE, UNCOMPLICATED                                               |
|         |                                                                                      |

| NICO_VA | NICO_VA_Desc                                                                                                  |
|---------|---------------------------------------------------------------------------------------------------------------|
| F17.200 | NICOTINE DEPENDENCE, UNSPECIFIED, UNCOMPLICATED                                                               |
|         |                                                                                                               |
| OTHD_VA | OTHD_VA_Desc                                                                                                  |
| F18.10  | INHALANT ABUSE, UNCOMPLICATED                                                                                 |
| F18.20  | INHALANT DEPENDENCE, UNCOMPLICATED                                                                            |
| F19.10  | OTHER PSYCHOACTIVE SUBSTANCE ABUSE, UNCOMPLICATED                                                             |
| F19.120 | OTHER PSYCHOACTIVE SUBSTANCE ABUSE WITH INTOXICATION, UNCOMPLICATED                                           |
| F19.121 | OTHER PSYCHOACTIVE SUBSTANCE ABUSE WITH INTOXICATION DELIRIUM                                                 |
| F19.122 | OTHER PSYCHOACTIVE SUBSTANCE ABUSE WITH INTOXICATION WITH PERCEPTUAL DISTURBANCES                             |
| F19.129 | OTHER PSYCHOACTIVE SUBSTANCE ABUSE WITH INTOXICATION, UNSPECIFIED                                             |
| F19.14  | OTHER PSYCHOACTIVE SUBSTANCE ABUSE WITH PSYCHOACTIVE SUBSTANCE-INDUCED MOOD DISORDER                          |
| F19.150 | OTHER PSYCHOACTIVE SUBSTANCE ABUSE WITH PSYCHOACTIVE SUBSTANCE-INDUCED PSYCHOTIC DISORDER WITH DELUSIONS      |
| F19.151 | OTHER PSYCHOACTIVE SUBSTANCE ABUSE WITH PSYCHOACTIVE SUBSTANCE-INDUCED PSYCHOTIC DISORDER WITH HALLUCINATIONS |
| F19.159 | OTHER PSYCHOACTIVE SUBSTANCE ABUSE WITH PSYCHOACTIVE SUBSTANCE-INDUCED PSYCHOTIC DISORDER, UNSPECIFIED        |
| F19.16  | OTHER PSYCHOACTIVE SUBSTANCE ABUSE WITH PSYCHOACTIVE SUBSTANCE-INDUCED PERSISTING AMNESTIC DISORDER           |
| F19.17  | OTHER PSYCHOACTIVE SUBSTANCE ABUSE WITH PSYCHOACTIVE SUBSTANCE-INDUCED PERSISTING DEMENTIA                    |
| F19.180 | OTHER PSYCHOACTIVE SUBSTANCE ABUSE WITH PSYCHOACTIVE SUBSTANCE-INDUCED ANXIETY DISORDER                       |
| F19.181 | OTHER PSYCHOACTIVE SUBSTANCE ABUSE WITH PSYCHOACTIVE SUBSTANCE-INDUCED SEXUAL DYSFUNCTION                     |
| F19.182 | OTHER PSYCHOACTIVE SUBSTANCE ABUSE WITH PSYCHOACTIVE SUBSTANCE-INDUCED SLEEP DISORDER                         |
| F19.188 | OTHER PSYCHOACTIVE SUBSTANCE ABUSE WITH OTHER PSYCHOACTIVE SUBSTANCE-INDUCED DISORDER                         |
| F19.19  | OTHER PSYCHOACTIVE SUBSTANCE ABUSE WITH UNSPECIFIED PSYCHOACTIVE SUBSTANCE-INDUCED DISORDER                   |
| F19.20  | OTHER PSYCHOACTIVE SUBSTANCE DEPENDENCE, UNCOMPLICATED                                                        |
| F19.21  | OTHER PSYCHOACTIVE SUBSTANCE DEPENDENCE, IN REMISSION                                                         |
| F19.220 | OTHER PSYCHOACTIVE SUBSTANCE DEPENDENCE WITH INTOXICATION, UNCOMPLICATED                                      |
| F19.221 | OTHER PSYCHOACTIVE SUBSTANCE DEPENDENCE WITH INTOXICATION DELIRIUM                                            |
| F19.222 | OTHER PSYCHOACTIVE SUBSTANCE DEPENDENCE WITH INTOXICATION WITH PERCEPTUAL DISTURBANCE                         |
| F19.229 | OTHER PSYCHOACTIVE SUBSTANCE DEPENDENCE WITH INTOXICATION, UNSPECIFIED                                        |
| F19.230 | OTHER PSYCHOACTIVE SUBSTANCE DEPENDENCE WITH WITHDRAWAL, UNCOMPLICATED                                        |
| F19.231 | OTHER PSYCHOACTIVE SUBSTANCE DEPENDENCE WITH WITHDRAWAL DELIRIUM                                              |

|         |                                                                                                                     |
|---------|---------------------------------------------------------------------------------------------------------------------|
| F19.232 | OTHER PSYCHOACTIVE SUBSTANCE DEPENDENCE WITH WITHDRAWAL WITH PERCEPTUAL DISTURBANCE                                 |
| F19.239 | OTHER PSYCHOACTIVE SUBSTANCE DEPENDENCE WITH WITHDRAWAL, UNSPECIFIED                                                |
| F19.24  | OTHER PSYCHOACTIVE SUBSTANCE DEPENDENCE WITH PSYCHOACTIVE SUBSTANCE-INDUCED MOOD DISORDER                           |
| F19.250 | OTHER PSYCHOACTIVE SUBSTANCE DEPENDENCE WITH PSYCHOACTIVE SUBSTANCE-INDUCED PSYCHOTIC DISORDER WITH DELUSIONS       |
| F19.251 | OTHER PSYCHOACTIVE SUBSTANCE DEPENDENCE WITH PSYCHOACTIVE SUBSTANCE-INDUCED PSYCHOTIC DISORDER WITH HALLUCINATIONS  |
| F19.259 | OTHER PSYCHOACTIVE SUBSTANCE DEPENDENCE WITH PSYCHOACTIVE SUBSTANCE-INDUCED PSYCHOTIC DISORDER, UNSPECIFIED         |
| F19.26  | OTHER PSYCHOACTIVE SUBSTANCE DEPENDENCE WITH PSYCHOACTIVE SUBSTANCE-INDUCED PERSISTING AMNESTIC DISORDER            |
| F19.27  | OTHER PSYCHOACTIVE SUBSTANCE DEPENDENCE WITH PSYCHOACTIVE SUBSTANCE-INDUCED PERSISTING DEMENTIA                     |
| F19.280 | OTHER PSYCHOACTIVE SUBSTANCE DEPENDENCE WITH PSYCHOACTIVE SUBSTANCE-INDUCED ANXIETY DISORDER                        |
| F19.281 | OTHER PSYCHOACTIVE SUBSTANCE DEPENDENCE WITH PSYCHOACTIVE SUBSTANCE-INDUCED SEXUAL DYSFUNCTION                      |
| F19.282 | OTHER PSYCHOACTIVE SUBSTANCE DEPENDENCE WITH PSYCHOACTIVE SUBSTANCE-INDUCED SLEEP DISORDER                          |
| F19.288 | OTHER PSYCHOACTIVE SUBSTANCE DEPENDENCE WITH OTHER PSYCHOACTIVE SUBSTANCE-INDUCED DISORDER                          |
| F19.29  | OTHER PSYCHOACTIVE SUBSTANCE DEPENDENCE WITH UNSPECIFIED PSYCHOACTIVE SUBSTANCE-INDUCED DISORDER                    |
| F19.90  | OTHER PSYCHOACTIVE SUBSTANCE USE, UNSPECIFIED, UNCOMPLICATED                                                        |
| F19.920 | OTHER PSYCHOACTIVE SUBSTANCE USE, UNSPECIFIED WITH INTOXICATION, UNCOMPLICATED                                      |
| F19.921 | OTHER PSYCHOACTIVE SUBSTANCE USE, UNSPECIFIED WITH INTOXICATION WITH DELIRIUM                                       |
| F19.922 | OTHER PSYCHOACTIVE SUBSTANCE USE, UNSPECIFIED WITH INTOXICATION WITH PERCEPTUAL DISTURBANCE                         |
| F19.929 | OTHER PSYCHOACTIVE SUBSTANCE USE, UNSPECIFIED WITH INTOXICATION, UNSPECIFIED                                        |
| F19.930 | OTHER PSYCHOACTIVE SUBSTANCE USE, UNSPECIFIED WITH WITHDRAWAL, UNCOMPLICATED                                        |
| F19.931 | OTHER PSYCHOACTIVE SUBSTANCE USE, UNSPECIFIED WITH WITHDRAWAL DELIRIUM                                              |
| F19.932 | OTHER PSYCHOACTIVE SUBSTANCE USE, UNSPECIFIED WITH WITHDRAWAL WITH PERCEPTUAL DISTURBANCE                           |
| F19.939 | OTHER PSYCHOACTIVE SUBSTANCE USE, UNSPECIFIED WITH WITHDRAWAL, UNSPECIFIED                                          |
| F19.94  | OTHER PSYCHOACTIVE SUBSTANCE USE, UNSPECIFIED WITH PSYCHOACTIVE SUBSTANCE-INDUCED MOOD DISORDER                     |
| F19.950 | OTHER PSYCHOACTIVE SUBSTANCE USE, UNSPECIFIED WITH PSYCHOACTIVE SUBSTANCE-INDUCED PSYCHOTIC DISORDER WITH DELUSIONS |



|         |                                                                                                                          |
|---------|--------------------------------------------------------------------------------------------------------------------------|
| F19.951 | OTHER PSYCHOACTIVE SUBSTANCE USE, UNSPECIFIED WITH PSYCHOACTIVE SUBSTANCE-INDUCED PSYCHOTIC DISORDER WITH HALLUCINATIONS |
| F19.959 | OTHER PSYCHOACTIVE SUBSTANCE USE, UNSPECIFIED WITH PSYCHOACTIVE SUBSTANCE-INDUCED PSYCHOTIC DISORDER, UNSPECIFIED        |
| F19.96  | OTHER PSYCHOACTIVE SUBSTANCE USE, UNSPECIFIED WITH PSYCHOACTIVE SUBSTANCE-INDUCED PERSISTING AMNESTIC DISORDER           |
| F19.97  | OTHER PSYCHOACTIVE SUBSTANCE USE, UNSPECIFIED WITH PSYCHOACTIVE SUBSTANCE-INDUCED PERSISTING DEMENTIA                    |
| F19.980 | OTHER PSYCHOACTIVE SUBSTANCE USE, UNSPECIFIED WITH PSYCHOACTIVE SUBSTANCE-INDUCED ANXIETY DISORDER                       |
| F19.981 | OTHER PSYCHOACTIVE SUBSTANCE USE, UNSPECIFIED WITH PSYCHOACTIVE SUBSTANCE-INDUCED SEXUAL DYSFUNCTION                     |
| F19.982 | OTHER PSYCHOACTIVE SUBSTANCE USE, UNSPECIFIED WITH PSYCHOACTIVE SUBSTANCE-INDUCED SLEEP DISORDER                         |
| F19.988 | OTHER PSYCHOACTIVE SUBSTANCE USE, UNSPECIFIED WITH OTHER PSYCHOACTIVE SUBSTANCE-INDUCED DISORDER                         |
| F19.99  | OTHER PSYCHOACTIVE SUBSTANCE USE, UNSPECIFIED WITH UNSPECIFIED PSYCHOACTIVE SUBSTANCE-INDUCED DISORDER                   |
|         |                                                                                                                          |
| BPAD_VA | BPAD_VA_Desc                                                                                                             |
| F31.0   | BIPOLAR DISORDER, CURRENT EPISODE HYPOMANIC                                                                              |
| F31.10  | BIPOLAR DISORDER, CURRENT EPISODE MANIC WITHOUT PSYCHOTIC FEATURES, UNSPECIFIED                                          |
| F31.11  | BIPOLAR DISORDER, CURRENT EPISODE MANIC WITHOUT PSYCHOTIC FEATURES, MILD                                                 |
| F31.12  | BIPOLAR DISORDER, CURRENT EPISODE MANIC WITHOUT PSYCHOTIC FEATURES, MODERATE                                             |
| F31.13  | BIPOLAR DISORDER, CURRENT EPISODE MANIC WITHOUT PSYCHOTIC FEATURES, SEVERE                                               |
| F31.2   | BIPOLAR DISORDER, CURRENT EPISODE MANIC SEVERE WITH PSYCHOTIC FEATURES                                                   |
| F31.30  | BIPOLAR DISORDER, CURRENT EPISODE DEPRESSED, MILD OR MODERATE SEVERITY, UNSPECIFIED                                      |
| F31.31  | BIPOLAR DISORDER, CURRENT EPISODE DEPRESSED, MILD                                                                        |
| F31.32  | BIPOLAR DISORDER, CURRENT EPISODE DEPRESSED, MODERATE                                                                    |
| F31.4   | BIPOLAR DISORDER, CURRENT EPISODE DEPRESSED, SEVERE, WITHOUT PSYCHOTIC FEATURES                                          |
| F31.5   | BIPOLAR DISORDER, CURRENT EPISODE DEPRESSED, SEVERE, WITH PSYCHOTIC FEATURES                                             |
| F31.60  | BIPOLAR DISORDER, CURRENT EPISODE MIXED, UNSPECIFIED                                                                     |
| F31.61  | BIPOLAR DISORDER, CURRENT EPISODE MIXED, MILD                                                                            |
| F31.62  | BIPOLAR DISORDER, CURRENT EPISODE MIXED, MODERATE                                                                        |
| F31.63  | BIPOLAR DISORDER, CURRENT EPISODE MIXED, SEVERE, WITHOUT PSYCHOTIC FEATURES                                              |
| F31.64  | BIPOLAR DISORDER, CURRENT EPISODE MIXED, SEVERE, WITH PSYCHOTIC FEATURES                                                 |
| F31.70  | BIPOLAR DISORDER, CURRENTLY IN REMISSION, MOST RECENT EPISODE UNSPECIFIED                                                |
| F31.71  | BIPOLAR DISORDER, IN PARTIAL REMISSION, MOST RECENT EPISODE HYPOMANIC                                                    |

|         |                                                                       |
|---------|-----------------------------------------------------------------------|
| F31.72  | BIPOLAR DISORDER, IN FULL REMISSION, MOST RECENT EPISODE HYPOMANIC    |
| F31.73  | BIPOLAR DISORDER, IN PARTIAL REMISSION, MOST RECENT EPISODE MANIC     |
| F31.74  | BIPOLAR DISORDER, IN FULL REMISSION, MOST RECENT EPISODE MANIC        |
| F31.75  | BIPOLAR DISORDER, IN PARTIAL REMISSION, MOST RECENT EPISODE DEPRESSED |
| F31.76  | BIPOLAR DISORDER, IN FULL REMISSION, MOST RECENT EPISODE DEPRESSED    |
| F31.77  | BIPOLAR DISORDER, IN PARTIAL REMISSION, MOST RECENT EPISODE MIXED     |
| F31.78  | BIPOLAR DISORDER, IN FULL REMISSION, MOST RECENT EPISODE MIXED        |
| F31.81  | BIPOLAR II DISORDER                                                   |
| F31.89  | OTHER BIPOLAR DISORDER                                                |
| F31.9   | BIPOLAR DISORDER, UNSPECIFIED                                         |
|         |                                                                       |
| SCHZ_VA | SCHZ_VA_Desc                                                          |
| F20.0   | PARANOID SCHIZOPHRENIA                                                |
| F20.1   | DISORGANIZED SCHIZOPHRENIA                                            |
| F20.2   | CATATONIC SCHIZOPHRENIA                                               |
| F20.3   | UNDIFFERENTIATED SCHIZOPHRENIA                                        |
| F20.5   | RESIDUAL SCHIZOPHRENIA                                                |
| F20.81  | SCHIZOPHRENIFORM DISORDER                                             |
| F20.89  | OTHER SCHIZOPHRENIA                                                   |
| F20.9   | SCHIZOPHRENIA, UNSPECIFIED                                            |
| F21.    | SCHIZOTYPAL DISORDER                                                  |
| F25.0   | SCHIZOAFFECTIVE DISORDER, BIPOLAR TYPE                                |
| F25.1   | SCHIZOAFFECTIVE DISORDER, DEPRESSIVE TYPE                             |
| F25.8   | OTHER SCHIZOAFFECTIVE DISORDERS                                       |
| F25.9   | SCHIZOAFFECTIVE DISORDER, UNSPECIFIED                                 |
|         |                                                                       |
| ANXI_VA | ANXI_VA_Desc                                                          |
| F40.00  | AGORAPHOBIA, UNSPECIFIED                                              |
| F40.01  | AGORAPHOBIA WITH PANIC DISORDER                                       |
| F40.02  | AGORAPHOBIA WITHOUT PANIC DISORDER                                    |
| F40.10  | SOCIAL PHOBIA, UNSPECIFIED                                            |
| F40.11  | SOCIAL PHOBIA, GENERALIZED                                            |
| F40.210 | ARACHNOPHOBIA                                                         |
| F40.218 | OTHER ANIMAL TYPE PHOBIA                                              |
| F40.220 | FEAR OF THUNDERSTORMS                                                 |
| F40.228 | OTHER NATURAL ENVIRONMENT TYPE PHOBIA                                 |
| F40.230 | FEAR OF BLOOD                                                         |
| F40.231 | FEAR OF INJECTIONS AND TRANSFUSIONS                                   |
| F40.232 | FEAR OF OTHER MEDICAL CARE                                            |
| F40.233 | FEAR OF INJURY                                                        |
| F40.240 | CLAUSTROPHOBIA                                                        |

|         |                                                                    |
|---------|--------------------------------------------------------------------|
| F40.241 | ACROPHOBIA                                                         |
| F40.242 | FEAR OF BRIDGES                                                    |
| F40.243 | FEAR OF FLYING                                                     |
| F40.248 | OTHER SITUATIONAL TYPE PHOBIA                                      |
| F40.290 | ANDROPHOBIA                                                        |
| F40.291 | GYNEPHOBIA                                                         |
| F40.298 | OTHER SPECIFIED PHOBIA                                             |
| F40.8   | OTHER PHOBIC ANXIETY DISORDERS                                     |
| F40.9   | PHOBIC ANXIETY DISORDER, UNSPECIFIED                               |
| F41.0   | PANIC DISORDER [EPISODIC PAROXYSMAL ANXIETY] WITHOUT AGORAPHOBIA   |
| F41.1   | GENERALIZED ANXIETY DISORDER                                       |
| F41.3   | OTHER MIXED ANXIETY DISORDERS                                      |
| F41.8   | OTHER SPECIFIED ANXIETY DISORDERS                                  |
| F41.9   | ANXIETY DISORDER, UNSPECIFIED                                      |
| F42.    | OBSESSIVE-COMPULSIVE DISORDER                                      |
| F42.2   | MIXED OBSESSIONAL THOUGHTS AND ACTS                                |
| F42.3   | HOARDING DISORDER                                                  |
| F42.4   | EXCORIATION (SKIN-PICKING) DISORDER                                |
| F42.8   | OTHER OBSESSIVE-COMPULSIVE DISORDER                                |
| F42.9   | OBSESSIVE-COMPULSIVE DISORDER, UNSPECIFIED                         |
| F43.0   | ACUTE STRESS REACTION                                              |
| F43.20  | ADJUSTMENT DISORDER, UNSPECIFIED                                   |
| F43.21  | ADJUSTMENT DISORDER WITH DEPRESSED MOOD                            |
| F43.22  | ADJUSTMENT DISORDER WITH ANXIETY                                   |
| F43.23  | ADJUSTMENT DISORDER WITH MIXED ANXIETY AND DEPRESSED MOOD          |
| F43.24  | ADJUSTMENT DISORDER WITH DISTURBANCE OF CONDUCT                    |
| F43.25  | ADJUSTMENT DISORDER WITH MIXED DISTURBANCE OF EMOTIONS AND CONDUCT |
| F43.29  | ADJUSTMENT DISORDER WITH OTHER SYMPTOMS                            |
| F43.8   | OTHER REACTIONS TO SEVERE STRESS                                   |
| F43.9   | REACTION TO SEVERE STRESS, UNSPECIFIED                             |
| F44.0   | DISSOCIATIVE AMNESIA                                               |
| F44.1   | DISSOCIATIVE FUGUE                                                 |
| F44.2   | DISSOCIATIVE STUPOR                                                |
| F44.4   | CONVERSION DISORDER WITH MOTOR SYMPTOM OR DEFICIT                  |
| F44.5   | CONVERSION DISORDER WITH SEIZURES OR CONVULSIONS                   |
| F44.6   | CONVERSION DISORDER WITH SENSORY SYMPTOM OR DEFICIT                |
| F44.7   | CONVERSION DISORDER WITH MIXED SYMPTOM PRESENTATION                |
| F44.81  | DISSOCIATIVE IDENTITY DISORDER                                     |
| F44.89  | OTHER DISSOCIATIVE AND CONVERSION DISORDERS                        |
| F44.9   | DISSOCIATIVE AND CONVERSION DISORDER, UNSPECIFIED                  |
| F45.0   | SOMATIZATION DISORDER                                              |

|        |                                                            |
|--------|------------------------------------------------------------|
| F45.1  | UNDIFFERENTIATED SOMATOFORM DISORDER                       |
| F45.20 | HYPOCHONDRIACAL DISORDER, UNSPECIFIED                      |
| F45.21 | HYPOCHONDRIASIS                                            |
| F45.22 | BODY DYSMORPHIC DISORDER                                   |
| F45.29 | OTHER HYPOCHONDRIACAL DISORDERS                            |
| F45.41 | PAIN DISORDER EXCLUSIVELY RELATED TO PSYCHOLOGICAL FACTORS |
| F45.42 | PAIN DISORDER WITH RELATED PSYCHOLOGICAL FACTORS           |
| F45.8  | OTHER SOMATOFORM DISORDERS                                 |
| F45.9  | SOMATOFORM DISORDER, UNSPECIFIED                           |
| F48.1  | DEPERSONALIZATION-DEREALIZATION SYNDROME                   |
| F48.2  | PSEUDOBULBAR AFFECT                                        |
| F48.8  | OTHER SPECIFIED NONPSYCHOTIC MENTAL DISORDERS              |
| F48.9  | NONPSYCHOTIC MENTAL DISORDER, UNSPECIFIED                  |

**eTable 6.** Associations Between Receipt of Timely Depression Follow-up and Treatment and Various Patient Characteristics (Among All Screen-Positive Patients)

|                                             | Follow-up with 84 days |            |         | Follow-up with 180 days |             |         | Minimally appropriate treatment |           |         |
|---------------------------------------------|------------------------|------------|---------|-------------------------|-------------|---------|---------------------------------|-----------|---------|
|                                             | OR                     | 95% CI     | p-value | OR                      | 95% CI      | p-value | OR                              | 95% CI    | p-value |
| n = 37,063 person-years                     |                        |            |         |                         |             |         |                                 |           |         |
| <b><i>Patient Characteristics</i></b>       |                        |            |         |                         |             |         |                                 |           |         |
| <b>Age</b>                                  | 0.98                   | .978-0.983 | <.001   | 0.98                    | 0.975-0.981 | <.001   | 0.976                           | 0.97-0.98 | <.001   |
| <b>Sex</b>                                  |                        |            |         |                         |             |         |                                 |           |         |
| Men (ref)                                   | -                      | -          | -       | -                       | -           | -       | -                               | -         | -       |
| Female                                      | 1.08                   | 0.95-1.23  | 0.60    | 1.05                    | 0.93-1.18   | 0.43    | 1.30                            | 1.16-1.46 | <.001   |
| <b>Race-Ethnicity</b>                       |                        |            |         |                         |             |         |                                 |           |         |
| White (ref)                                 | -                      | -          | -       | -                       | -           | -       | -                               | -         | -       |
| Black                                       | 1.32                   | 1.17-1.48  | <.001   | 1.40                    | 1.26-1.56   | <.001   | 1.30                            | 1.17-1.44 | <.001   |
| Hispanic                                    | 1.03                   | 0.93-1.15  | 0.53    | 1.04                    | 0.95-1.14   | 0.40    | 0.99                            | 0.91-1.09 | 0.90    |
| Other                                       | 1.10                   | 0.90-1.34  | 0.37    | 1.17                    | 1.04-1.31   | 0.01    | 1.07                            | 0.91-1.25 | 0.44    |
| Unknown/Missing                             | 1.17                   | 1.02-1.34  | 0.02    | 1.17                    | 1.04-1.31   | 0.01    | 1.05                            | 0.94-1.17 | 0.37    |
| <b>Marital Status</b>                       |                        |            |         |                         |             |         |                                 |           |         |
| Married (ref)                               | -                      | -          | -       | -                       | -           | -       | -                               | -         | -       |
| Single/Previously Married                   | 0.98                   | .897-1.06  | 0.60    | 0.98                    | 0.91-1.06   | 0.67    | 1.07                            | 0.99-1.14 | 0.07    |
| <b>Means Test</b>                           |                        |            |         |                         |             |         |                                 |           |         |
| Exempt (ref)                                | -                      | -          | -       | -                       | -           | -       | -                               | -         | -       |
| Non-Exempt                                  | 1.01                   | .842-1.20  | 0.94    | 1.12                    | 0.96-1.31   | 0.14    | 1.09                            | 0.94-1.26 | 0.26    |
| Any Copay Required                          | 0.94                   | .809-1.08  | 0.36    | 0.98                    | 0.87-1.11   | 0.79    | 0.91                            | 0.81-1.02 | 0.26    |
| Missing                                     | 1.05                   | .934-1.18  | 0.40    | 1.09                    | 0.98-1.21   | 0.79    | 1.04                            | 0.95-1.15 | 0.38    |
| <b>Service-Connected Disability</b>         |                        |            |         |                         |             |         |                                 |           |         |
| 0% (ref)                                    | -                      | -          | -       | -                       | -           | -       | -                               | -         | -       |
| 1-50%                                       | 0.97                   | .735-1.28  | 0.84    | 0.99                    | 0.78-1.26   | 0.93    | 0.87                            | 0.70-1.09 | 0.22    |
| 51-100%                                     | 0.56                   | .422-.733  | <.001   | 0.63                    | 0.49-0.79   | <.001   | 0.69                            | 0.55-0.85 | <.001   |
| Missing                                     | 1.26                   | .969-1.63  | 0.09    | 1.31                    | 1.04-1.64   | 0.02    | 1.01                            | 0.82-1.24 | 0.92    |
| <b>Charlson Comorbidity Index</b>           |                        |            |         |                         |             |         |                                 |           |         |
| 0 (ref)                                     | -                      | -          | -       | -                       | -           | -       | -                               | -         | -       |
| 1                                           | 0.91                   | .817-1.01  | 0.08    | 1.02                    | 0.93-1.12   | 0.65    | 1.06                            | 0.98-1.16 | 0.15    |
| 2+                                          | 0.81                   | .720-.910  | <.001   | 0.93                    | 0.84-1.02   | 0.14    | 1.03                            | 0.94-1.12 | 0.53    |
| <b>Mental Health/Substance Use Disorder</b> |                        |            |         |                         |             |         |                                 |           |         |
| Anxiety Disorder                            | 4.90                   | 4.22-5.69  | <.001   | 5.71                    | 4.98-6.53   | <.001   | 5.34                            | 4.76-5.98 | <.001   |
| PTSD                                        | 3.85                   | 3.36-4.40  | <.001   | 5.23                    | 4.59-5.96   | <.001   | 5.26                            | 4.70-5.90 | <.001   |
| Serious Mental Illness                      | 3.40                   | 2.76-4.18  | <.001   | 5.21                    | 4.22-6.43   | <.001   | 4.91                            | 4.00-6.02 | <.001   |
| Alcohol Use Disorder                        | 2.27                   | 1.98-2.60  | <.001   | 2.31                    | 2.04-2.62   | <.001   | 2.07                            | 1.84-2.32 | <.001   |
| Substance Use Disorder                      | 2.32                   | 1.96-2.76  | <.001   | 2.35                    | 1.99-2.77   | <.001   | 2.45                            | 2.07-2.90 | <.001   |
